# Supplementary material for: Association of Food Allergy, Respiratory Allergy, and Skin Allergy with Attention Deficit/Hyperactivity Disorder among Children
Source: MDPI journal article supplement (doi:10.3390/nu14030474), 2022-01-21
Supplement: s1 [file s1]

**Table S1.** Characteristics of the participants by ADHD status.

| Variables                      | Children without ADHD | Children with ADHD |        |
|--------------------------------|-----------------------|--------------------|--------|
| No. of participants            | 177197                | 15376              |        |
| Age, year                      | 10.4 (0.01)           | 11.8 (0.04)        | <0.001 |
| Sex                            |                       |                    |        |
| Boys                           | 88142 (49.24%)        | 11011 (71.46%)     | <0.001 |
| Girls                          | 89055 (50.76%)        | 4365 (28.54%)      |        |
| Race/ethnicity                 |                       |                    |        |
| Hispanic                       | 50166 (20.67%)        | 2614 (12.40%)      | <0.001 |
| Non-Hispanic White             | 85250 (57.26%)        | 9425 (67.65%)      |        |
| Non-Hispanic Black             | 27067 (14.27%)        | 2416 (14.43%)      |        |
| Other                          | 14714 (7.80%)         | 921 (5.52%)        |        |
| Family highest education level |                       |                    |        |
| Less than high school          | 38314 (18.92%)        | 2878 (17.25%)      | <0.001 |
| High school                    | 23088 (12.91%)        | 2338 (15.32%)      |        |
| College or higher              | 114787 (67.66%)       | 10131 (67.25%)     |        |
| Missing                        | 1008 (0.52%)          | 29 (0.18%)         |        |
| Family income to poverty ratio |                       |                    |        |
| <1.0                           | 25034 (14.12%)        | 2719 (18.31%)      | <0.001 |
| 1.0-1.9                        | 32379 (18.01%)        | 2996 (19.89%)      |        |
| 2.0-3.9                        | 45067 (25.88%)        | 3893 (25.19%)      |        |
| >=4.0                          | 39358 (22.55%)        | 3468 (21.53%)      |        |
| Missing                        | 35359 (19.43%)        | 2300 (15.08%)      |        |
| Geographic region              |                       |                    |        |
| Northeast                      | 29812 (17.59%)        | 2539 (16.03%)      | <0.001 |
| Midwest                        | 35939 (23.35%)        | 3561 (26.01%)      |        |
| South                          | 63501 (35.67%)        | 6396 (42.16%)      |        |
| West                           | 47945 (23.39%)        | 2880 (15.81%)      |        |
| Food allergy                   |                       |                    |        |
| Yes                            | 7565 (4.21%)          | 1038 (6.83%)       | <0.001 |
| No                             | 169632 (95.79%)       | 14338 (93.17%)     |        |
| Respiratory allergy            |                       |                    |        |
| Yes                            | 21380 (11.83%)        | 2838 (18.35%)      | <0.001 |
| No                             | 155817 (88.17%)       | 12538 (81.65%)     |        |
| Skin allergy                   |                       |                    |        |
| Yes                            | 16604 (9.57%)         | 2099 (13.88%)      | <0.001 |
| No                             | 160593 (90.43%)       | 13277 (86.12%)     |        |

Data are presented as weighted means and standard errors in parentheses for continuous variables, and frequencies and weighted percentages in parentheses for categorical variables.

**Table S2.** Association of allergic conditions with ADHD, a sensitivity analysis by restricting to children (n=166,255) whose information was reported by their parents rather than other household members.

|                                      | Children without specific allergic conditions | Children with specific allergic conditions | P-value      |
|--------------------------------------|-----------------------------------------------|--------------------------------------------|--------------|
| <b>Food allergy</b>                  |                                               |                                            |              |
| No. of ADHD cases/total participants | 12268/158625                                  | 901/7630                                   |              |
| Model 1 <sup>a</sup>                 | 1.00 (reference)                              | <b>1.73 (1.55-1.93)</b>                    | <0.001       |
| Model 2 <sup>b</sup>                 | 1.00 (reference)                              | <b>1.72 (1.55-1.92)</b>                    | <0.001       |
| Model 3 <sup>c</sup>                 | 1.00 (reference)                              | <b>1.44(1.28-1.62)</b>                     | <0.001       |
| <b>Respiratory allergy</b>           |                                               |                                            |              |
| No. of ADHD cases/total participants | 10734/145176                                  | 2435/21079                                 |              |
| Model 1 <sup>a</sup>                 | 1.00 (reference)                              | <b>1.59 (1.49-1.69)</b>                    | <0.001       |
| Model 2 <sup>b</sup>                 | 1.00 (reference)                              | <b>1.50 (1.41-1.60)</b>                    | <0.001       |
| Model 3 <sup>c</sup>                 | 1.00 (reference)                              | <b>1.37 (1.28-1.46)</b>                    | <b>0.003</b> |
| <b>Skin allergy</b>                  |                                               |                                            |              |
| No. of ADHD cases/total participants | 11318/149557                                  | 1851/16698                                 |              |
| Model 1 <sup>a</sup>                 | 1.00 (reference)                              | <b>1.68 (1.57-1.79)</b>                    | <0.001       |
| Model 2 <sup>b</sup>                 | 1.00 (reference)                              | <b>1.66 (1.55-1.77)</b>                    | <0.001       |
| Model 3 <sup>c</sup>                 | 1.00 (reference)                              | <b>1.50 (1.39-1.61)</b>                    | <0.001       |

ADHD, attention deficit/hyperactivity disorder. <sup>a</sup> Model 1: adjusted for age and sex. <sup>b</sup> Model 2: model 1 plus race/ethnicity, family highest education level, family income to poverty ratio, and geographic region. <sup>c</sup> Model 3: model 2 plus mutual adjustment for other allergic conditions as mentioned.
